# Supplementary material for: Identification and validation of crucial lnc-TRIM28-14 and hub genes promoting gastric cancer peritoneal metastasis
Source: Springer Nature journal article supplement (doi:10.1186/s12885-023-10544-8), 2023-01-23
Supplement: MOESM2 [file 23946244]

**Table S2. Primers of lncRNAs and genes for RT-PCR and qRT-PCR**

| Primer Name      | Length of Product(bp) | Sequence, 5'-3'           |
|------------------|-----------------------|---------------------------|
| DNM3OS-FP        | 192                   | CCCCTGGATGTAATAAGTGTTC    |
| DNM3OS-RP        |                       | GTGTTATTGTTGCTGCATTCAGTG  |
| lnc-MFAP2-53-FP  | 122                   | TTAGAGCGCAGAATGGGGAA      |
| lnc-MFAP2-53-RP  |                       | AGTTCCCAGACGCCTAGTTT      |
| lnc-PPIAL4C-4-FP | 172                   | GAAAGCTGAAAGCGTGCGAG      |
| lnc-PPIAL4C-4-RP |                       | AGTCTGCACAGTTGTCCTGC      |
| lnc-RFNG-1-FP    | 102                   | TCCATGGAGGGAAATGGGAC      |
| lnc-RFNG-1-RP    |                       | GGAGCCACGTGAAGTAAGA       |
| lnc-TRIM28-14-FP | 101                   | GGTGCTCGCACAAGAAAGC       |
| lnc-TRIM28-14-RP |                       | CCTGGAAGAGGCTCATGGTT      |
| lnc-YARS2-4-FP   | 154                   | AACTTCCAGTATGACCACACCC    |
| lnc-YARS2-4-RP   |                       | CAGGCTAACTTCTGAAAAATCCTGT |
| CD93-FP          | 192                   | TGGAGAACCAGTACAGTCCGA     |
| CD93-RP          |                       | TCCAAGGGGCCTTTAAGGAG      |
| COL1A2-FP        | 141                   | CAGCCGGAGATAGAGGACCA      |
| COL1A2-RP        |                       | ACTGAGCAGCAAAGTTCCCA      |
| COL3A1-FP        | 212                   | TGAAAGGACACAGAGGCTTCG     |
| COL3A1-RP        |                       | TGGTTGACCATCACTGCCTC      |
| COL4A1-FP        | 163                   | GGGGAGCCTGGTGAGTTTTTA     |
| COL4A1-RP        |                       | TCAATCCTACAGAACCCGGC      |
| COL4A2-FP        | 117                   | CAGCATGGGGAGAGACCAG       |
| COL4A2-RP        |                       | AACTTCTTCACACCCGCCAA      |
| COL6A1-FP        | 158                   | TCTGAGCATCATCGCCACG       |
| COL6A1-RP        |                       | ATTGAAGGAGCAGCACACT       |
| GAPGH-FP         | 345                   | TCGGAGTCAACGGATTTGGT      |
| GAPDH-RP         |                       | TGATGACCCTTTTGGCTCCC      |

FP: Forward Primer; RP: Reverse Primer
