# Supplementary material for: Identification and validation of crucial lnc-TRIM28-14 and hub genes promoting gastric cancer peritoneal metastasis
Source: Springer Nature journal article supplement (doi:10.1186/s12885-023-10544-8), 2023-01-23
Supplement: MOESM4 [file 23946244]

---

**Table S4. The top 15 lncRNAs ranked by degree in blue module**

---

| <b>node_name</b> | <b>Degree</b> | <b>MCC</b> |
|------------------|---------------|------------|
| lnc-RFNG-1:7     | 28            | 1662       |
| lnc-MFAP2-53:6   | 25            | 4374       |
| lnc-YARS2-4:1    | 24            | 6740       |
| lnc-TRIM28-14:5  | 22            | 1580       |
| lnc-PPIAL4C-4:16 | 22            | 4107       |
| DNM3OS:4         | 21            | 1886       |
| lnc-ACO1-6:1     | 21            | 184        |
| lnc-NEK7-4:1     | 20            | 281        |
| lnc-CLEC2D-1:2   | 20            | 138        |
| lnc-ITGA2-5:1    | 19            | 536        |
| lnc-BTG4-3:8     | 19            | 346        |
| lnc-TRPC4-2:1    | 18            | 632        |
| lnc-NAXD-5:1     | 16            | 525        |
| lnc-KDM1B-5:1    | 16            | 735        |
| lnc-CASP4-1:2    | 15            | 234        |

---

degree of lncRNAs was calculated by cytoHubba plugin 0.1 ( <http://apps.cytoscape.org/apps/cytohubba> )
