# Supplementary material for: Identification and validation of crucial lnc-TRIM28-14 and hub genes promoting gastric cancer peritoneal metastasis
Source: Springer Nature journal article supplement (doi:10.1186/s12885-023-10544-8), 2023-01-23
Supplement: MOESM6 [file 23946244]

**Table S6. The top 15 genes ranked by degree in magenta m**

| <b>node_name</b> | <b>Degree</b> | <b>MCC</b> |
|------------------|---------------|------------|
| COL1A2           | 28            | 8452       |
| CD93             | 22            | 763        |
| COL4A1           | 22            | 8604       |
| COL6A1           | 20            | 7064       |
| COL3A1           | 20            | 3842       |
| COL4A2           | 19            | 7638       |
| COL5A2           | 18            | 3951       |
| CTSK             | 17            | 754        |
| SPARC            | 17            | 786        |
| THY1             | 16            | 116        |
| TGFBI            | 16            | 152        |
| COL5A1           | 16            | 712        |
| PECAM1           | 15            | 338        |
| CLEC14A          | 14            | 576        |
| PDGFRB           | 14            | 472        |

Degree of genes was calculated by cytoHubba plugin 0.1 (<http://apps>).
