# Supplementary material for: Identification and validation of crucial lnc-TRIM28-14 and hub genes promoting gastric cancer peritoneal metastasis
Source: Springer Nature journal article supplement (doi:10.1186/s12885-023-10544-8), 2023-01-23
Supplement: MOESM7 [file 23946244]

**Table S7.** The correlation between clinicopathological parameters and expression of hub lncRNAs and genes in 90 GC patients.

| Parameters            | Cases | lnc-TRIM28-14 expression |      |                | CD93 expression |      |                | COL3A1 expression |      |                | COL4A1 expression |      |                |
|-----------------------|-------|--------------------------|------|----------------|-----------------|------|----------------|-------------------|------|----------------|-------------------|------|----------------|
|                       |       | Low                      | High | <i>p</i> value | Low             | High | <i>p</i> value | Low               | High | <i>p</i> value | Low               | High | <i>p</i> value |
| Age (years)           |       |                          |      |                |                 |      |                |                   |      |                |                   |      |                |
| <60                   | 39    | 22                       | 17   | 0.288          | 21              | 18   | 0.523          | 19                | 20   | 0.832          | 24                | 15   | 0.056          |
| ≥60                   | 51    | 23                       | 28   |                | 24              | 27   |                | 26                | 25   |                | 21                | 30   |                |
| Gender                |       |                          |      |                |                 |      |                |                   |      |                |                   |      |                |
| Female                | 25    | 10                       | 15   | 0.239          | 11              | 14   | 0.480          | 12                | 13   | 0.814          | 9                 | 16   | 0.099          |
| Male                  | 65    | 35                       | 30   |                | 34              | 31   |                | 33                | 32   |                | 36                | 29   |                |
| Tumor size (cm)       |       |                          |      |                |                 |      |                |                   |      |                |                   |      |                |
| <5                    | 35    | 20                       | 15   | 0.280          | 24              | 11   | 0.005          | 21                | 14   | 0.130          | 23                | 12   | 0.017          |
| ≥5                    | 55    | 25                       | 30   |                | 21              | 34   |                | 24                | 31   |                | 22                | 33   |                |
| Differentiation       |       |                          |      |                |                 |      |                |                   |      |                |                   |      |                |
| Moderately-well       | 31    | 23                       | 8    | 0.001          | 20              | 11   | 0.046          | 21                | 10   | 0.015          | 19                | 12   | 0.120          |
| Poorly                | 59    | 22                       | 37   |                | 25              | 34   |                | 24                | 35   |                | 26                | 33   |                |
| Depth of invasion     |       |                          |      |                |                 |      |                |                   |      |                |                   |      |                |
| T1+T2                 | 32    | 17                       | 15   | 0.660          | 20              | 12   | 0.078          | 23                | 9    | 0.002          | 19                | 13   | 0.186          |
| T3+T4                 | 58    | 28                       | 30   |                | 25              | 33   |                | 22                | 36   |                | 26                | 32   |                |
| Lymph node invasion   |       |                          |      |                |                 |      |                |                   |      |                |                   |      |                |
| No                    | 19    | 13                       | 6    | 0.071          | 9               | 10   | 0.796          | 7                 | 12   | 0.197          | 8                 | 11   | 0.438          |
| Yes                   | 71    | 32                       | 39   |                | 36              | 35   |                | 38                | 33   |                | 37                | 34   |                |
| Peritoneal metastasis |       |                          |      |                |                 |      |                |                   |      |                |                   |      |                |
| No                    | 60    | 36                       | 24   | 0.007          | 37              | 23   | 0.002          | 39                | 21   | <0.001         | 35                | 25   | 0.025          |
| Yes                   | 30    | 9                        | 21   |                | 8               | 22   |                | 6                 | 24   |                | 10                | 20   |                |

|           |    |    |    |       |    |    |       |    |    |        |    |    |       |
|-----------|----|----|----|-------|----|----|-------|----|----|--------|----|----|-------|
| TNM stage |    |    |    |       |    |    |       |    |    |        |    |    |       |
| I + II    | 29 | 19 | 10 | 0.042 | 18 | 11 | 0.114 | 24 | 5  | <0.001 | 17 | 12 | 0.259 |
| III + IV  | 61 | 26 | 35 |       | 27 | 34 |       | 21 | 40 |        | 28 | 33 |       |

---
