# Supplementary material for: Identification and validation of crucial lnc-TRIM28-14 and hub genes promoting gastric cancer peritoneal metastasis
Source: Springer Nature journal article supplement (doi:10.1186/s12885-023-10544-8), 2023-01-23
Supplement: MOESM8 [file 23946244]

**Table S8.** Univariate and multivariate Cox analyses of various potential prognostic factors in GC patients

|                                              | Univariate Cox analysis |                  | Multivariate Cox analysis |                |
|----------------------------------------------|-------------------------|------------------|---------------------------|----------------|
|                                              | HR (95%CI)              | <i>p</i> value   | HR (95%CI)                | <i>p</i> value |
| Age ( $\geq 60$ / $<60$ )                    | 1.619(0.898-2.916)      | 0.109            | -                         | -              |
| Gender(male/female)                          | 0.648(0.356-1.182)      | 0.157            | -                         | -              |
| Tumor size<br>( $\geq 5$ cm/ $<5$ cm)        | 1.91(1.048-3.479)       | <b>0.035</b>     | 1.400(0.691-2.838)        | 0.351          |
| Differentiation<br>(poorly/ moderately-well) | 2.068(1.108-3.860)      | <b>0.022</b>     | 1.231(0.616-2.460)        | 0.557          |
| Depth of invasion<br>(T3+T4/T1+T2)           | 2.073(1.109-3.915)      | <b>0.025</b>     | 1.432(0.707-2.898)        | 0.318          |
| Lymph node invasion<br>(Yes/No)              | 1.05(0.537-2.056)       | 0.886            | -                         | -              |
| Peritoneal metastasis<br>(Yes/No)            | 3.036(1.703-5.412)      | <b>&lt;0.001</b> | 2.283(1.237-4.212)        | <b>0.008</b>   |
| TNM Stage<br>(III-IV/I-II)                   | 2.692(1.367-5.300)      | <b>0.004</b>     | 1.594(0.715-3.554)        | 0.254          |
| lnc-TRIM28-14<br>expression<br>(high/low)    | 2.071(1.172-3.660)      | <b>0.012</b>     | 1.971(1.077-3.608)        | <b>0.028</b>   |
| CD93 expression<br>(high/low)                | 1.87(1.058-3.305)       | <b>0.031</b>     | 1.164(0.593-2.285)        | 0.658          |
| COL3A1 expression<br>(high/low)              | 2.443(1.364-4.376)      | <b>0.003</b>     | 1.268(0.587-2.741)        | 0.546          |
| COL4A1 expression<br>(high/low)              | 2.212(1.241-3.944)      | <b>0.007</b>     | 2.206(1.211-4.016)        | <b>0.01</b>    |

HR: hazard ratio; CI: confidence interval.
