# Supplementary material for: Identification and validation of crucial lnc-TRIM28-14 and hub genes promoting gastric cancer peritoneal metastasis
Source: Springer Nature journal article supplement (doi:10.1186/s12885-023-10544-8), 2023-01-23
Supplement: MOESM9 [file 23946244]

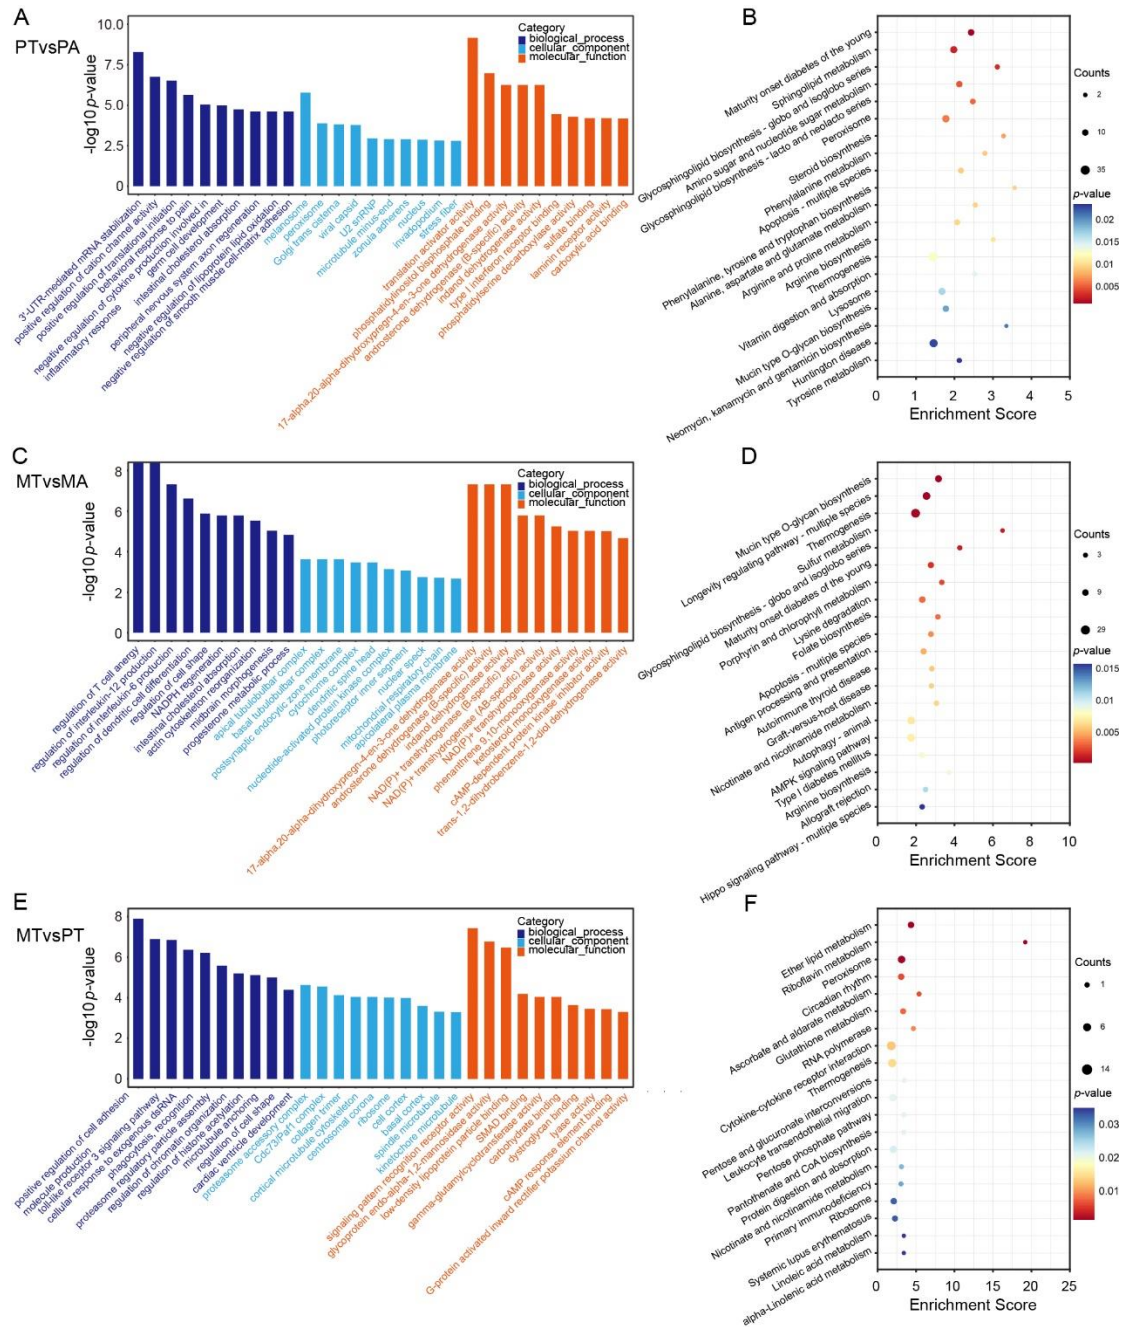

**Figure S1 Functional analysis of DElncRNAs.** (A, B) GO and KEGG analysis of DElncRNAs in PTvsPA. (C, D) GO and KEGG analysis of DElncRNAs in MTvsMA. (E, F) GO and KEGG analysis of DElncRNAs in MTvsPT. The DElncRNAs enriched GO terms and KEGG pathways were ranked according to  $-\log_{10}(p\text{-value})$  or  $p\text{-value}$ , and the top 10 GO terms and top 20 KEGG pathways were presented.
