# Supplementary material for: Identification and validation of crucial lnc-TRIM28-14 and hub genes promoting gastric cancer peritoneal metastasis
Source: Springer Nature journal article supplement (doi:10.1186/s12885-023-10544-8), 2023-01-23
Supplement: MOESM10 [file 23946244]

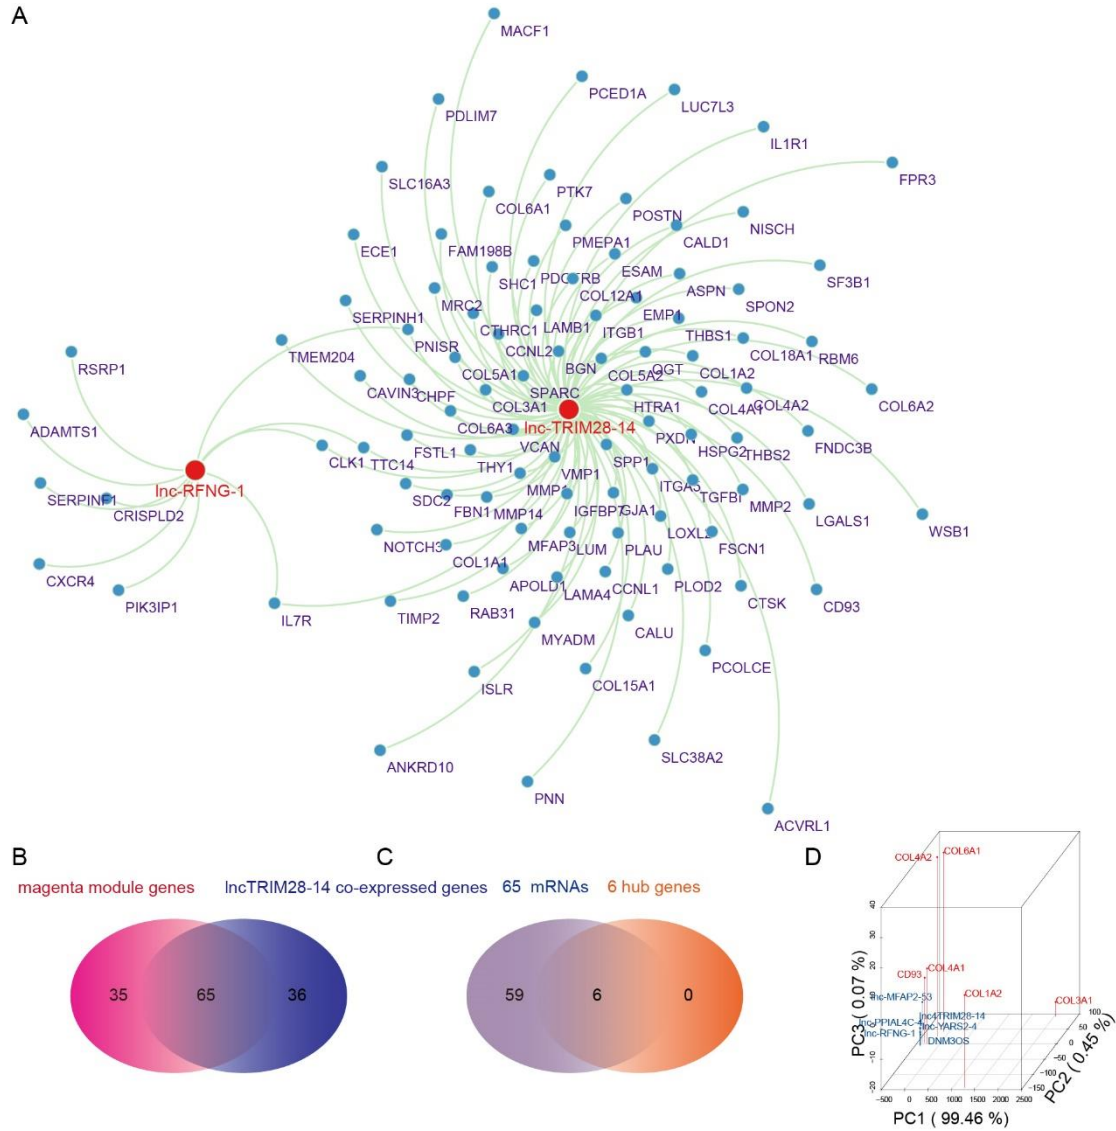

**Figure S2 Correlation analysis of hub lncRNAs and genes. (A)** The lncRNA-mRNA correlation network. Based on the correlation coefficient  $> 0.6$ ,  $p < 0.05$  as the cut-off values, the closer the distance is, the higher the correlation coefficient. **(B)** Venn analysis for co-expressed genes of lnc-TRIM28-14 and genes in magenta module. **(C)** Venn analysis showing that 6 candidate genes exactly included in the intersection in **B**. **(D)** PCA plot showing the correlation between GCPM-related biomarkers.
