# Supplementary material for: Identification and validation of crucial lnc-TRIM28-14 and hub genes promoting gastric cancer peritoneal metastasis
Source: Springer Nature journal article supplement (doi:10.1186/s12885-023-10544-8), 2023-01-23
Supplement: MOESM11 [file 23946244]

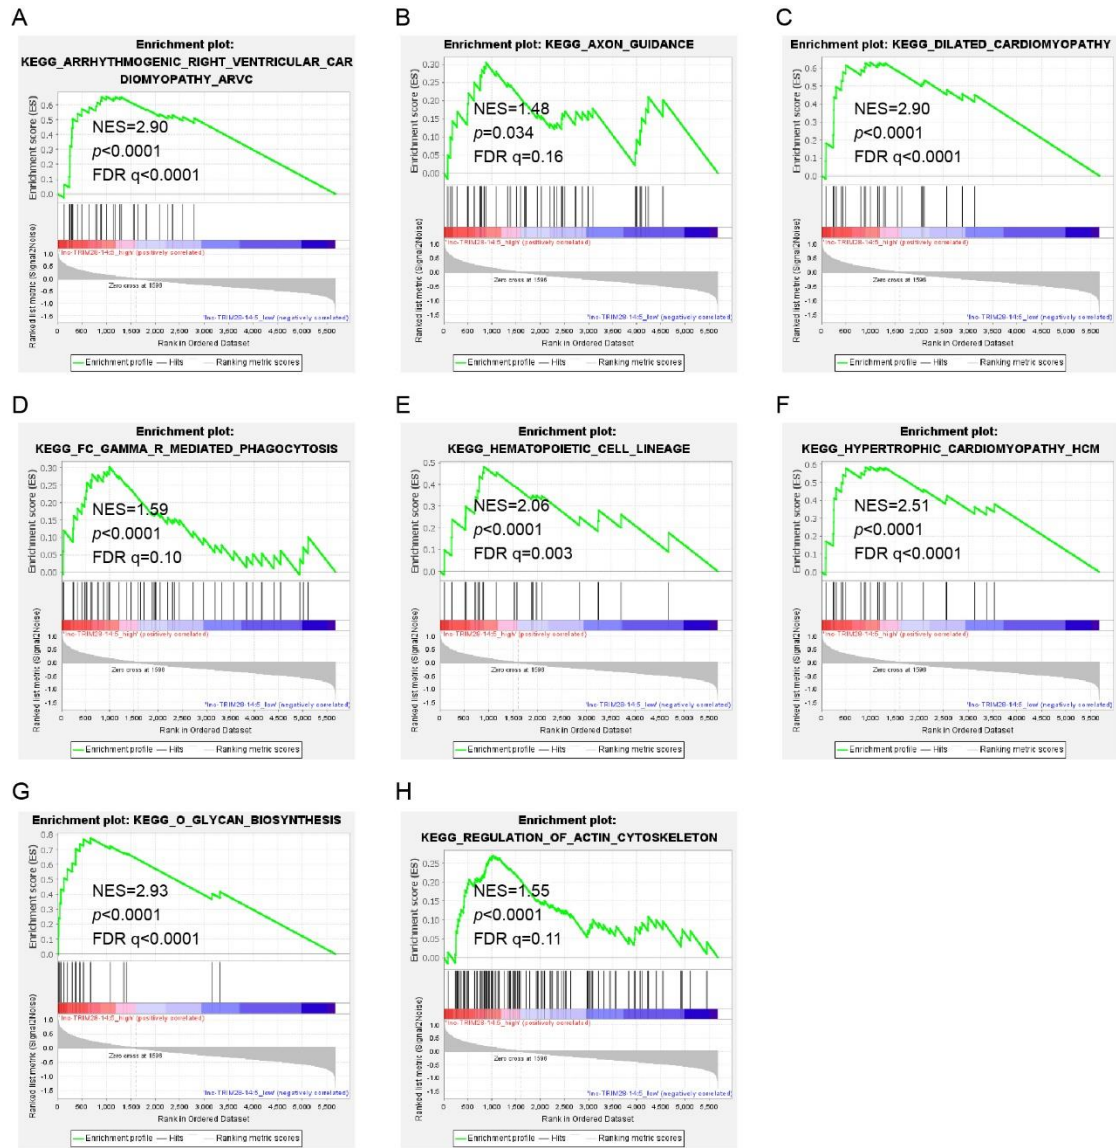

**Figure S3** GSEA analysis of pathways associated with the expression of lnc-TRIM28-14. (A-H) The remaining eight KEGG pathways significantly associated with the expression of lnc-TRIM28-14 ( $p<0.05$ , FDR  $q<0.25$ ).
