# Supplementary material for: Identification and validation of crucial lnc-TRIM28-14 and hub genes promoting gastric cancer peritoneal metastasis
Source: Springer Nature journal article supplement (doi:10.1186/s12885-023-10544-8), 2023-01-23
Supplement: MOESM12 [file 23946244]

A

DNA ladder

1000bp  
900bp  
800bp  
700bp  
600bp  
500bp  
400bp  
300bp  
200bp  
100bp

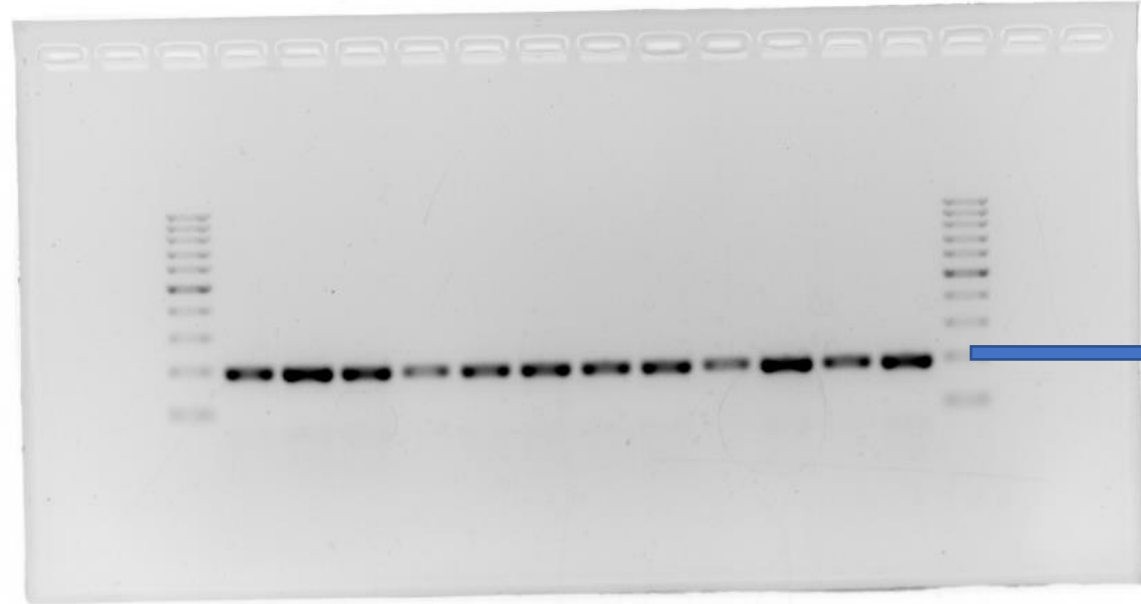

DNM3OS(192bp)

B

DNA ladder

1000bp  
900bp  
800bp  
700bp  
600bp  
500bp  
400bp  
300bp  
200bp  
100bp

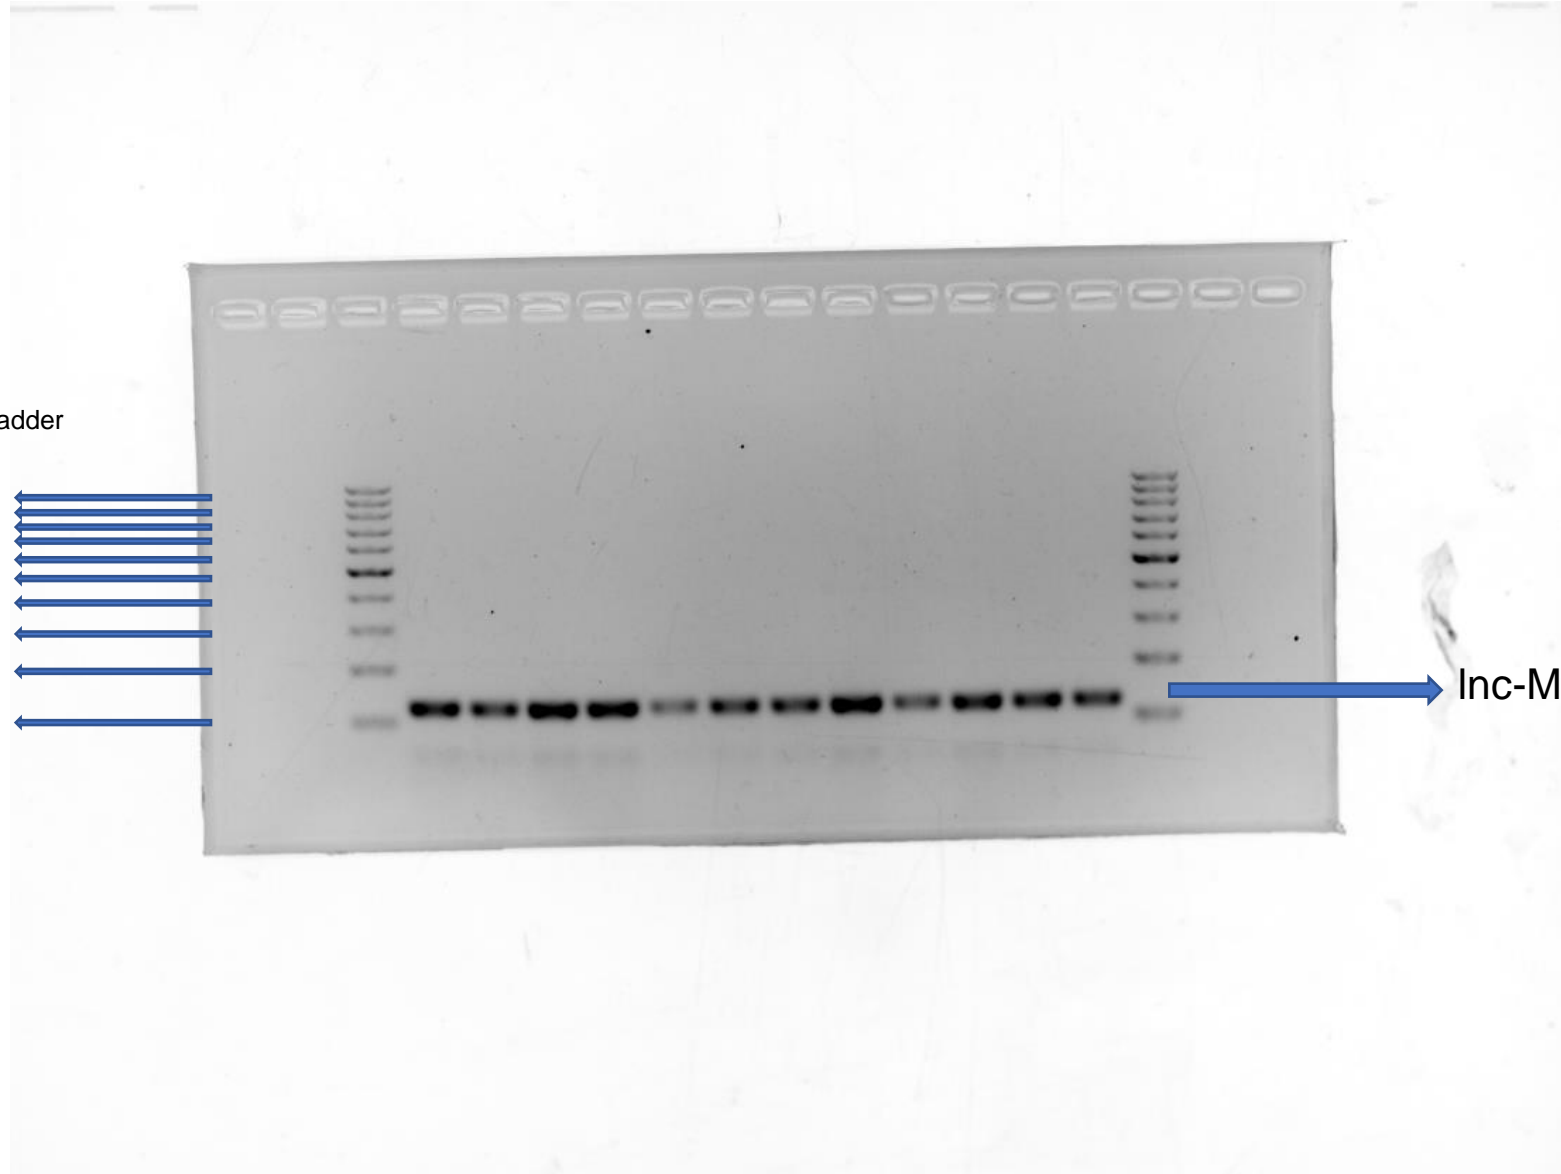

Inc-MFAP2-53(122bp)

C

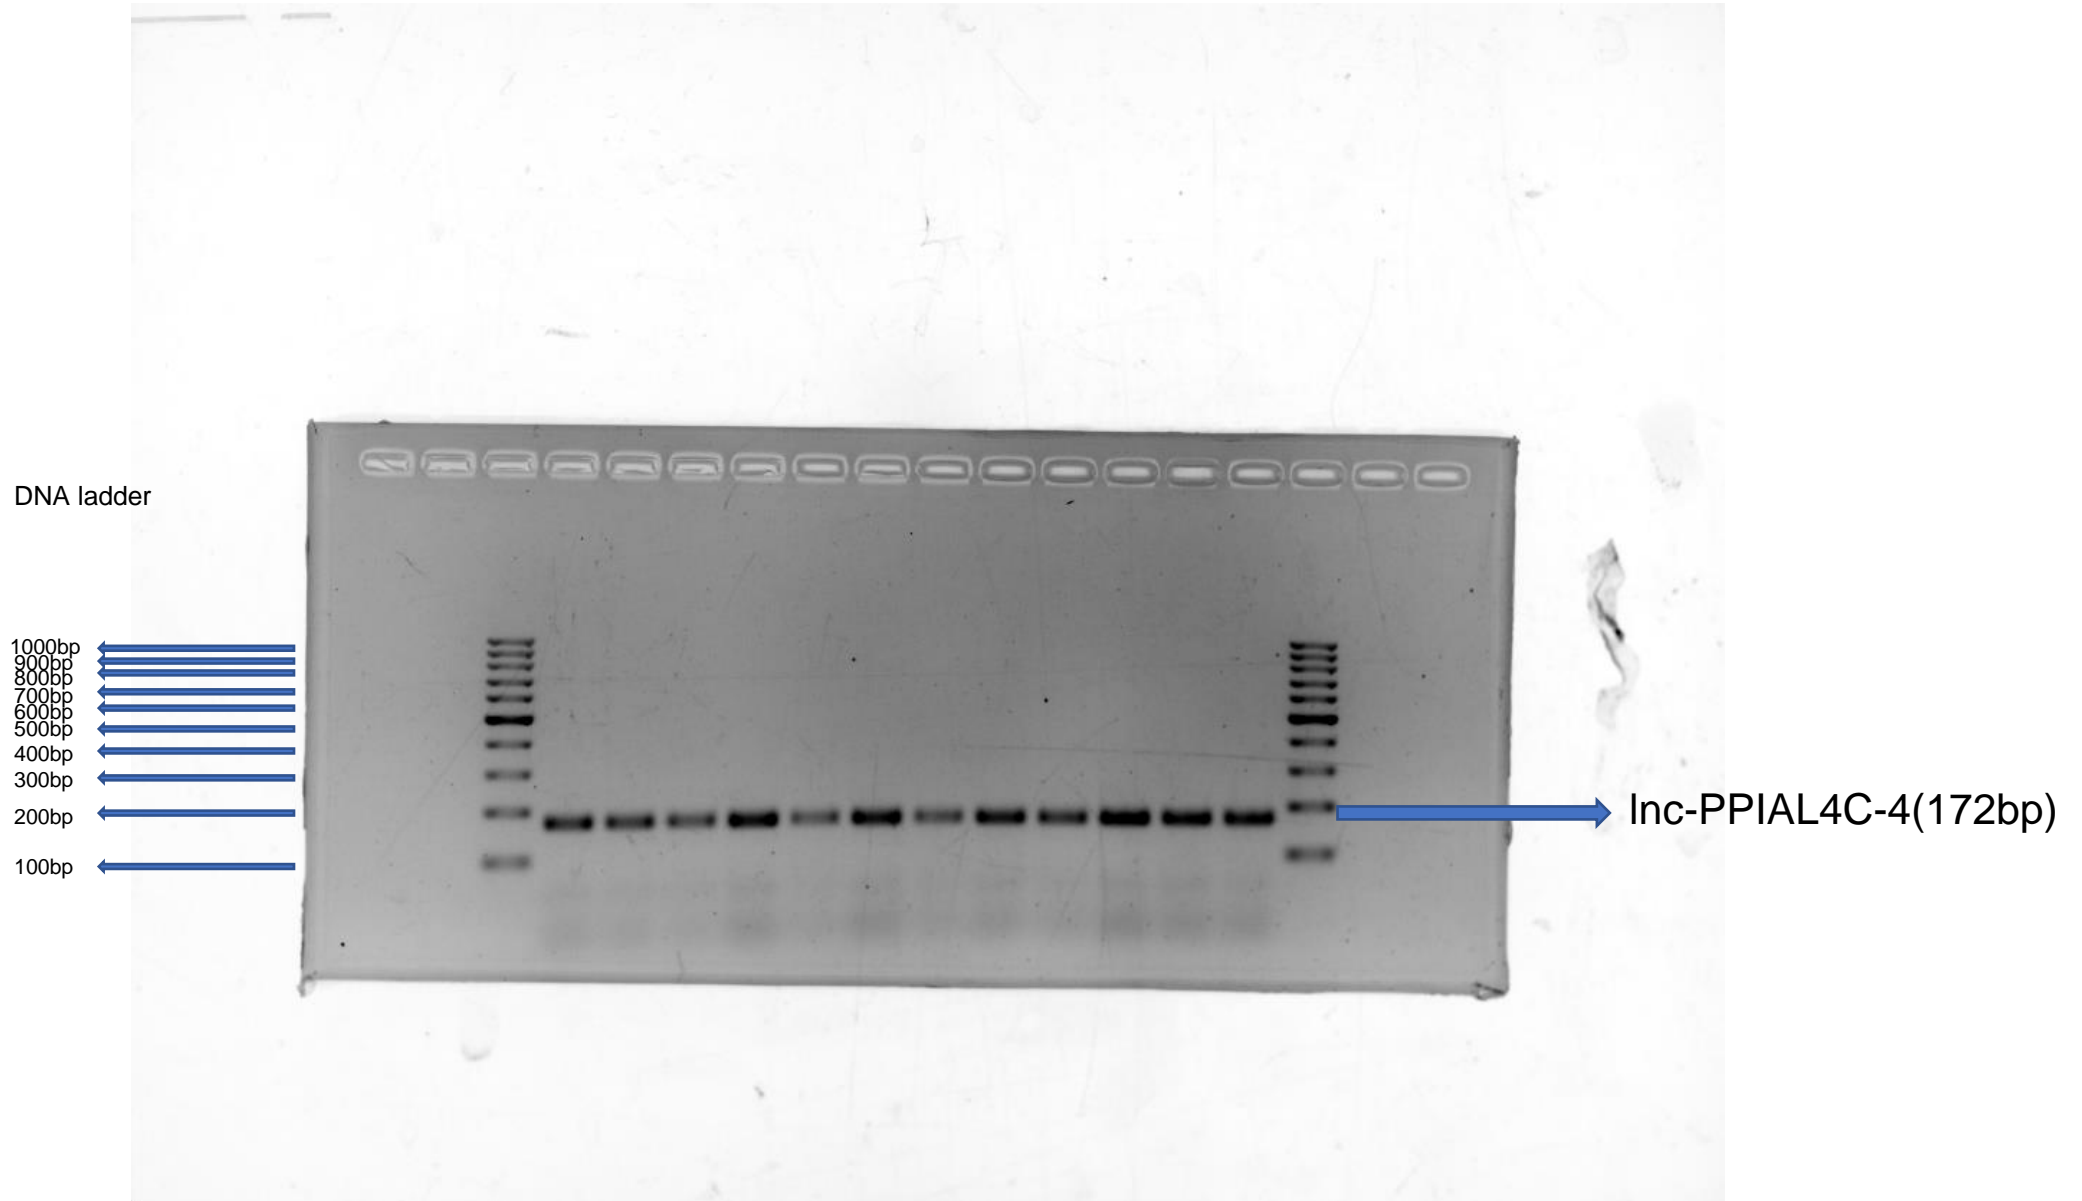

D

DNA ladder

1000bp  
900bp  
800bp  
700bp  
600bp  
400bp  
300bp  
200bp  
100bp

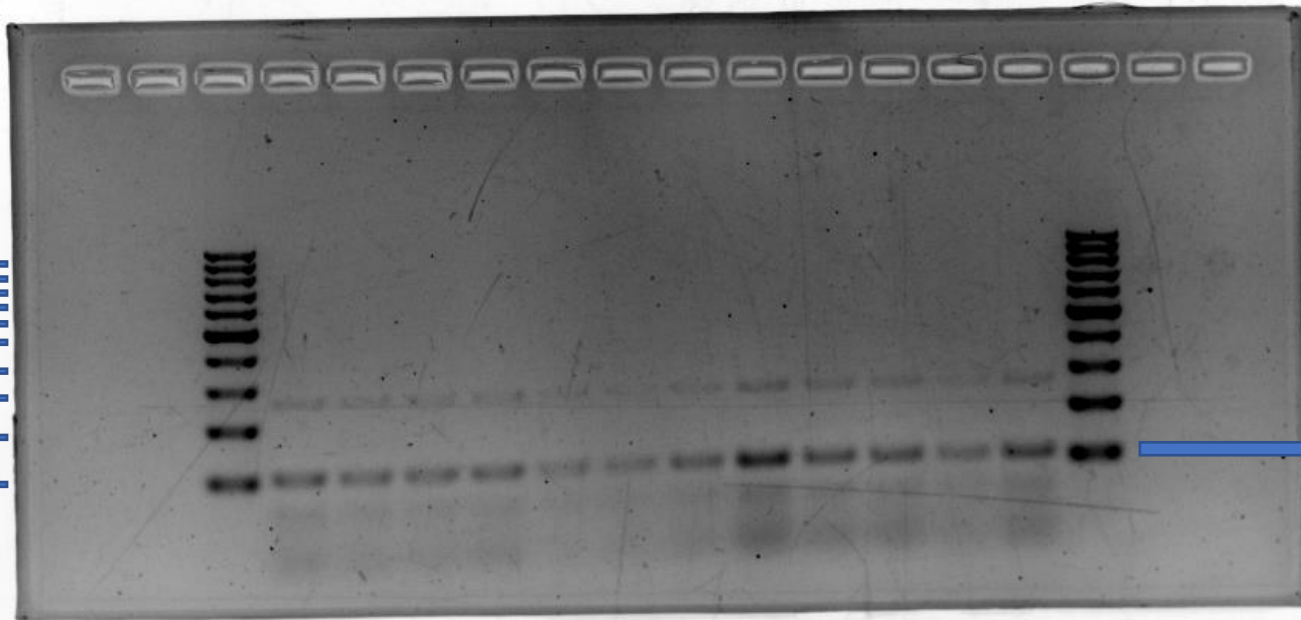

Inc-RFNG-1(102bp)

E

DNA ladder

1000bp  
900bp  
800bp  
700bp  
600bp  
500bp  
400bp  
300bp  
200bp  
100bp

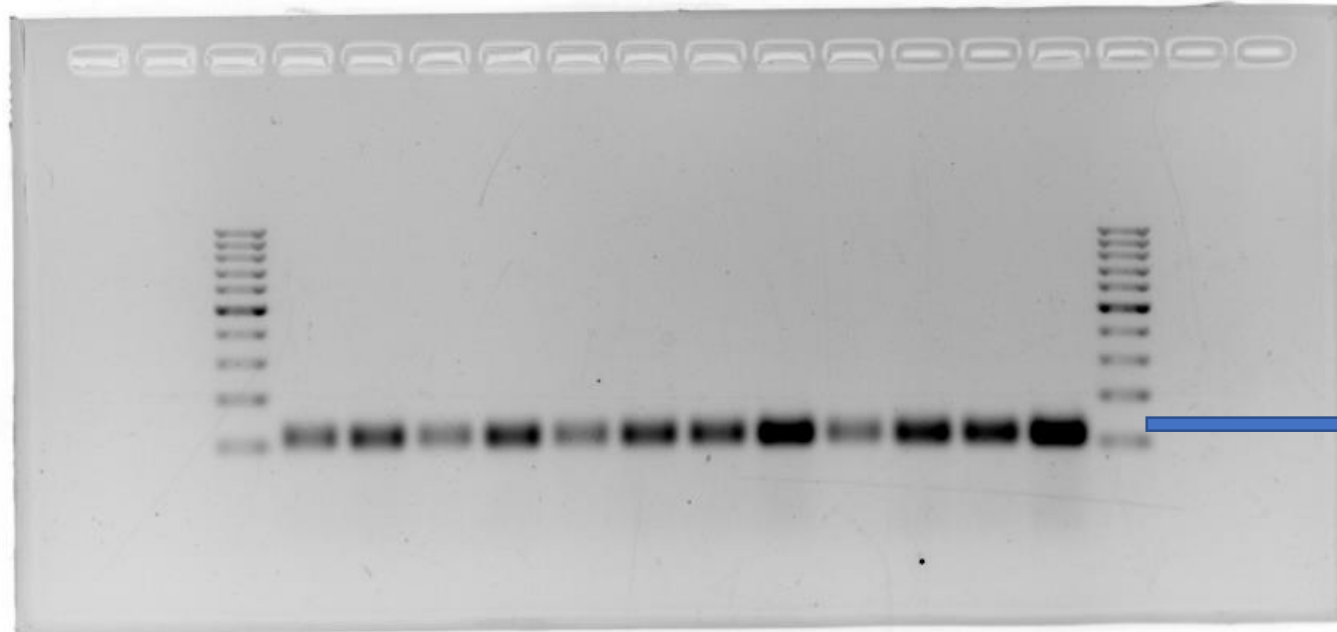

Inc-TRIM28-14(101bp)

F

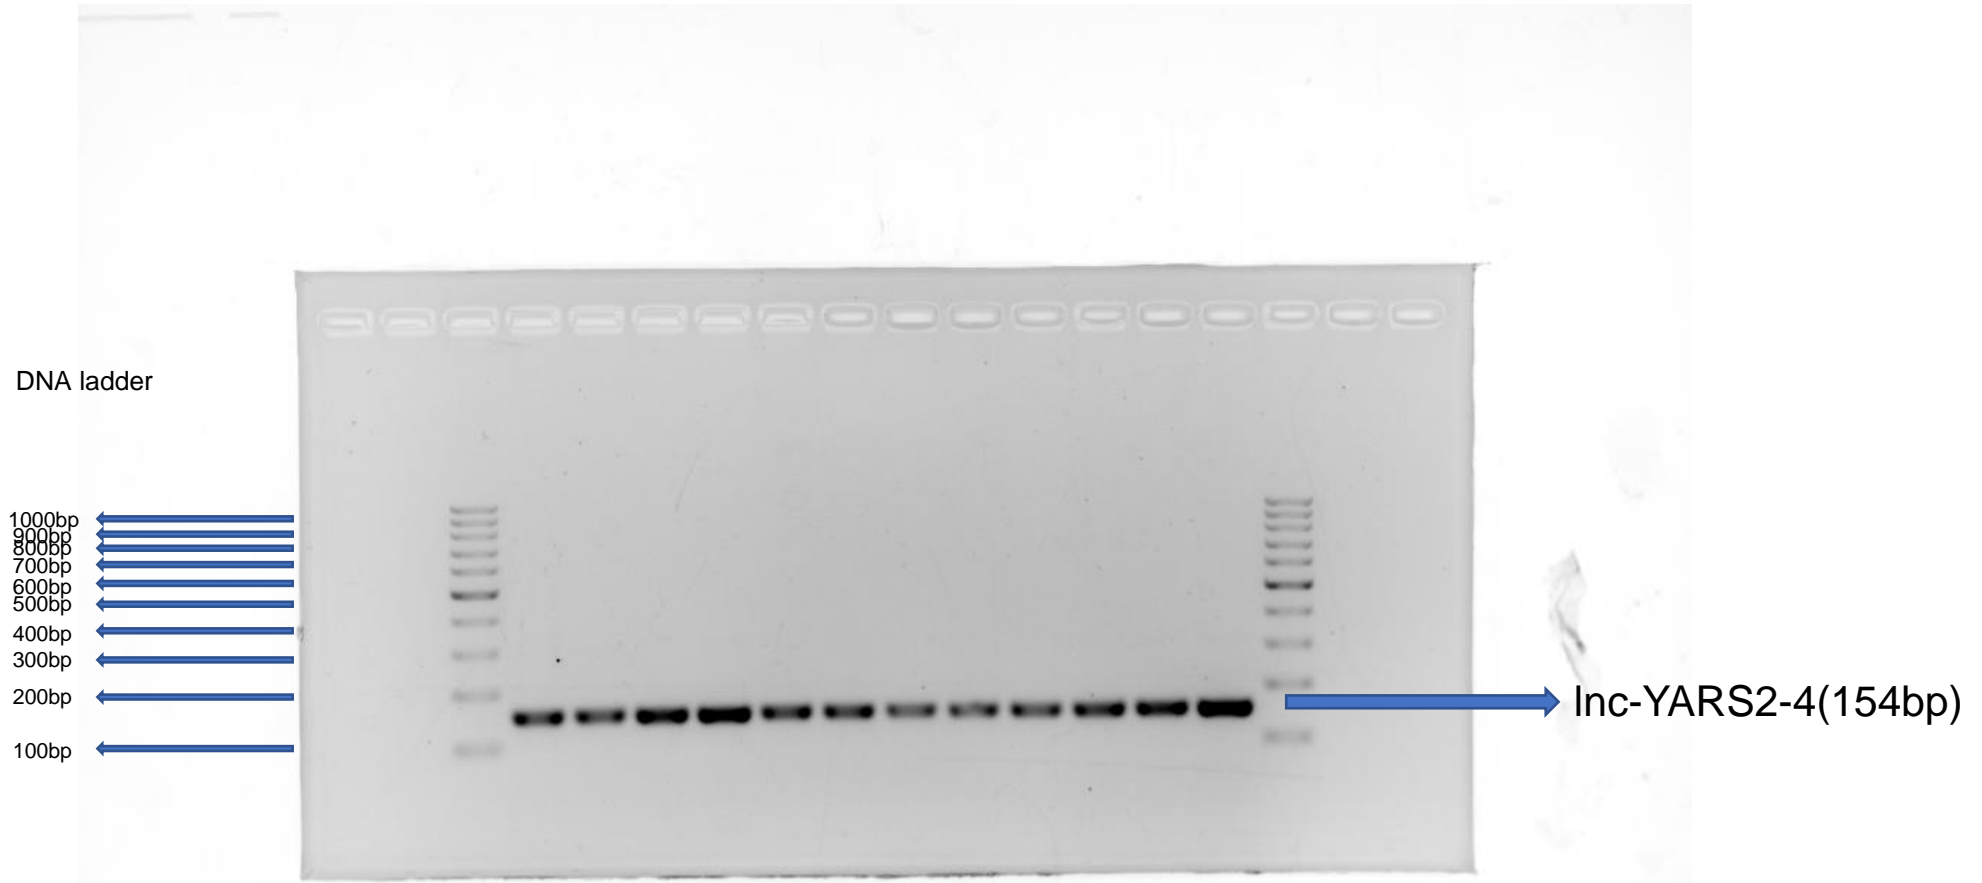

G

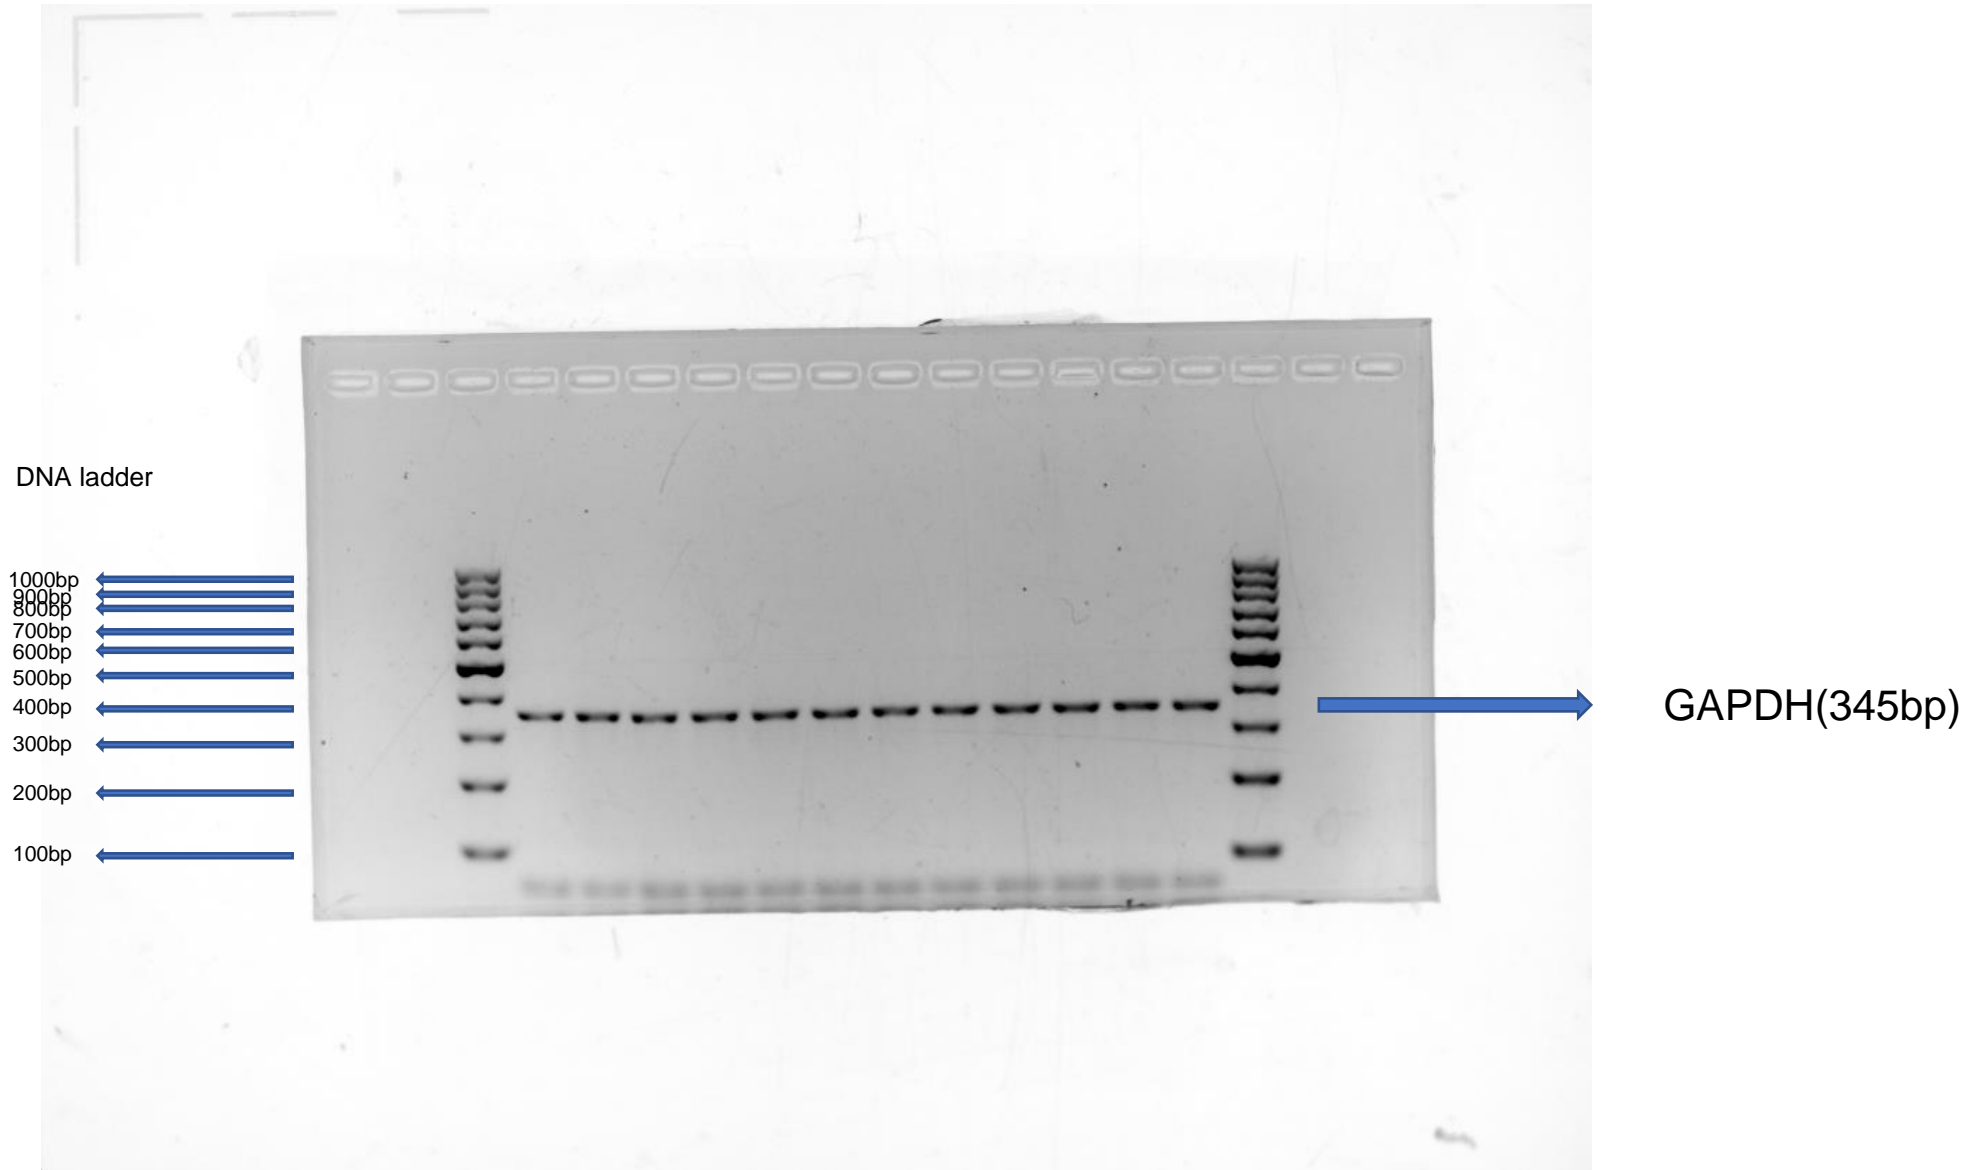

**Figure S4 Raw agarose gel electrophoresis images for hub lncRNAs analysis.**

(A-G) The PCR products were analyzed with agarose gel electrophoresis on a 2% agarose gel, and expression of six hub lncRNAs and GAPDH was shown. The 12 lanes were N1, T1, N2, T2, N3, T3, N4, T4, N5, T5, N6, T6. The first 6 samples were derived from paracancerous (N) and cancerous (T) tissues from 3 gastric cancer patients without peritoneal metastasis, and the last 6 samples were derived from paracancerous (N) and cancerous (T) tissues from 3 gastric cancer patients with peritoneal metastases.
