# Supplementary material for: Identification and validation of crucial lnc-TRIM28-14 and hub genes promoting gastric cancer peritoneal metastasis
Source: Springer Nature journal article supplement (doi:10.1186/s12885-023-10544-8), 2023-01-23
Supplement: MOESM13 [file 23946244]

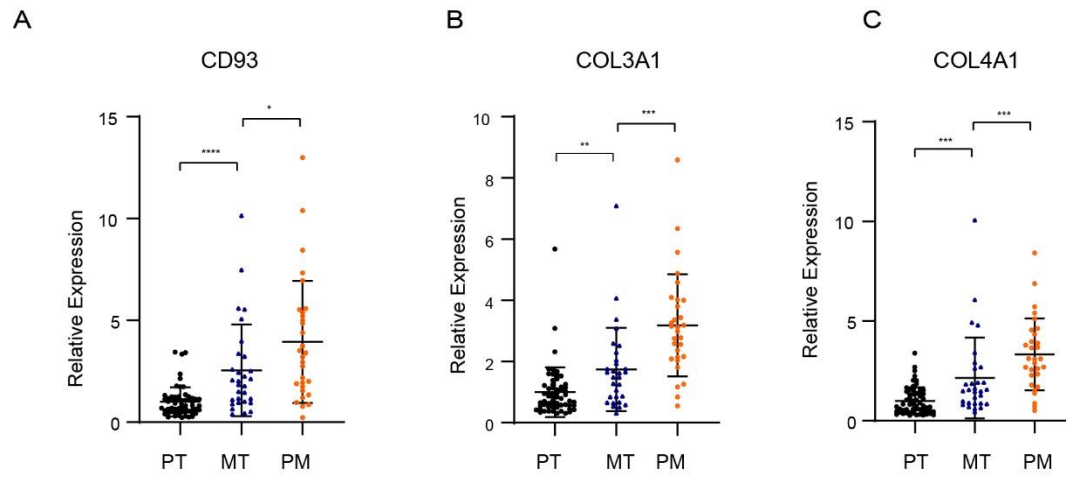

**Figure S5. Further verification of GCPM-related genes. (A-C)** CD93, COL3A1 and COL4A1 expression in different gastric cancer tissues determined by qRT-PCR. (PT, primary tumors without GCPM; MT, primary tumors with GCPM; PM, GC peritoneal metastases) Student's t test, \*,  $p < 0.05$ , \*\*,  $p < 0.01$ , \*\*\*,  $p < 0.001$ , \*\*\*\*,  $p < 0.0001$ , ns, not significant.
